# Supplementary material for: High Throughput Identification of the Potential Antioxidant Peptides in Ophiocordyceps sinensis
Source: MDPI journal article supplement (doi:10.3390/molecules27020438), 2022-01-10
Supplement: s1 [file s1]

Table S9

| Gene ID      | Primers                                                                                  |
|--------------|------------------------------------------------------------------------------------------|
| MSTRG.1154.1 | Forward primer 5'-TCGTCTTCAAAGCCAAGAGGT-3'<br>Reverse primer 5'-AGCTCACTGTCCGATAAACAG-3' |
| MSTRG.7028   | Forward primer 5'-CGCTTTTGTGTTGGTCGTCT-3'<br>Reverse primer 5'-GCAGAAATTGCCCTCGTTC-3'    |
| MSTRG.5117   | Forward primer 5'-CTTCCGGATCTCCAGGTCG-3'<br>Reverse primer 5'-TGATCCGGCAACGAGAGAAG-3'    |
| MSTRG.10287  | Forward primer 5'-CGAGCATTGCGTCCTCATTC-3'<br>Reverse primer 5'-CAGAGTTGATGGGTCGGCAT-3'   |
| MSTRG.9713   | Forward primer 5'-ATTGGCAAATCCGTTGCAC-3'<br>Reverse primer 5'-TAGTCGGGCTTTGGTTGGAG-3'    |
| MSTRG.9912   | Forward primer 5'-TCTCCTCCTTCCTTGTTTGC-3'<br>Reverse primer 5'-AATGGCAATGGCGCAGTAG-3'    |
| MSTRG.10795  | Forward primer 5'-CCTCACCCTACCTCTTGAC-3'<br>Reverse primer 5'-ATGTCCCTACCGAGATCCGAG-3'   |
| MSTRG.5870   | Forward primer 5'-ACAGAGCAAGTCGAGCAACG-3'<br>Reverse primer 5'-CTTGCTTGCAGGTATCCGAC-3'   |
| MSTRG.1158.1 | Forward primer 5'-GAATATTGGCGCTTCCGCTG-3'<br>Reverse primer 5'-CTCGGAGGCGTTCTTGATGT-3'   |
